# Supplementary material for: Korean Practice Guideline for Gastric Cancer 2018: an Evidence-based, Multi-disciplinary Approach
Source: PubMed Central journal article supplement — J Gastric Cancer. 2019 Mar 19;19(1):1–48. doi: 10.5230/jgc.2019.19.e8 (PMC6441770; doi:10.5230/jgc.2019.19.e8), 2019-03-19
Supplement: jgc-19-1-s002.pdf [file jgc-19-1-s002.pdf]

## Supplement Data 2. Selected literature lists

### Statement 1

1. Kim HS, Lee DK, Baik SK, Kim JM, Kwon SO, Kim DS, et al. Endoscopic mucosal resection with a ligation device for early gastric cancer and precancerous lesions: comparison of its therapeutic efficacy with surgical resection. *Yonsei Med J.* 2000;41(5):577-83.
2. Etoh T, Katai H, Fukagawa T, Sano T, Oda I, Gotoda T, et al. Treatment of early gastric cancer in the elderly patient: results of EMR and gastrectomy at a national referral center in Japan. *Gastrointestinal endoscopy.* 2005;62(6):868-71.
3. Choi KS, Jung HY, Choi KD, Lee GH, Song HJ, Kim DH, et al. EMR versus gastrectomy for intramucosal gastric cancer: comparison of long-term outcomes. *Gastrointestinal endoscopy.* 2011;73(5):942-8.
4. Chiu PW, Teoh AY, To KF, Wong SK, Liu SY, Lam CC, et al. Endoscopic submucosal dissection (ESD) compared with gastrectomy for treatment of early gastric neoplasia: a retrospective cohort study. *Surgical endoscopy.* 2012;26(12):3584-91.
5. Park CH, Lee H, Kim DW, Chung H, Park JC, Shin SK, et al. Clinical safety of endoscopic submucosal dissection compared with surgery in elderly patients with early gastric cancer: a propensity-matched analysis. *Gastrointestinal endoscopy.* 2014;80(4):599-609.
6. Choi IJ, Lee JH, Kim YI, Kim CG, Cho SJ, Lee JY, et al. Long-term outcome comparison of endoscopic resection and surgery in early gastric cancer meeting the absolute indication for endoscopic resection. *Gastrointestinal endoscopy.* 2015;81(2):333-41 e1.
7. Feng F, Sun L, Xu G, Cai L, Hong L, Yang J, et al. Is It Reasonable to Treat Early Gastric Cancer with Mucosal Infiltration and Well Differentiation by Endoscopic Submucosal Resection? *J Gastrointest Surg.* 2015;19(12):2111-9.
8. Kondo A, de Moura EG, Bernardo WM, Yagi OK, de Moura DT, de Moura ET, et al. Endoscopy vs surgery in the treatment of early gastric cancer: Systematic review. *World J Gastroenterol.* 2015;21(46):13177-87.
9. Cho JH, Cha SW, Kim HG, Lee TH, Cho JY, Ko WJ, et al. Long-term outcomes of endoscopic submucosal dissection for early gastric cancer: a comparison study to surgery using propensity score-matched analysis. *Surgical endoscopy.* 2016;30(9):3762-73.
10. Najmeh S, Cools-Lartigue J, Mueller C, Ferri LE. Comparing Laparoscopic to Endoscopic Resections for Early Gastric Cancer in a High Volume North American Center. *J Gastrointest Surg.* 2016;20(9):1547-53.

11. Pyo JH, Lee H, Min BH, Lee JH, Choi MG, Lee JH, et al. Long-Term Outcome of Endoscopic Resection vs. Surgery for Early Gastric Cancer: A Non-inferiority-Matched Cohort Study. *Am J Gastroenterol.* 2016;111(2):240-9.
12. Ryu SJ, Kim BW, Kim BG, Kim JH, Kim JS, Kim JI, et al. Endoscopic submucosal dissection versus surgical resection for early gastric cancer: a retrospective multicenter study on immediate and long-term outcome over 5 years. *Surgical endoscopy.* 2016;30(12):5283-9.
13. Chang JY, Shim KN, Tae CH, Lee KE, Lee J, Lee KH, et al. Comparison of clinical outcomes after endoscopic submucosal dissection and surgery in the treatment of early gastric cancer: A single-institute study. *Medicine (Baltimore).* 2017;96(30):e7210.
14. Gong EJ, Kim DH, Ahn JY, Jung KW, Lee JH, Choi KD, et al. Comparison of long-term outcomes of endoscopic submucosal dissection and surgery for esophagogastric junction adenocarcinoma. *Gastric cancer : official journal of the International Gastric Cancer Association and the Japanese Gastric Cancer Association.* 2017;20(Suppl 1):84-91.
15. Hahn KY, Park CH, Lee YK, Chung H, Park JC, Shin SK, et al. Comparative study between endoscopic submucosal dissection and surgery in patients with early gastric cancer. *Surgical endoscopy.* 2018;32(1):73-86.

## Statement 2

1. Chiu PW, Teoh AY, To KF, Wong SK, Liu SY, Lam CC, et al. Endoscopic submucosal dissection (ESD) compared with gastrectomy for treatment of early gastric neoplasia: a retrospective cohort study. *Surgical endoscopy*. 2012;26(12):3584-91.
2. Park CH, Lee H, Kim DW, Chung H, Park JC, Shin SK, et al. Clinical safety of endoscopic submucosal dissection compared with surgery in elderly patients with early gastric cancer: a propensity-matched analysis. *Gastrointestinal endoscopy*. 2014;80(4):599-609.
3. Feng F, Sun L, Xu G, Cai L, Hong L, Yang J, et al. Is It Reasonable to Treat Early Gastric Cancer with Mucosal Infiltration and Well Differentiation by Endoscopic Submucosal Resection? *J Gastrointest Surg*. 2015;19(12):2111-9.
4. Kim YI, Kim YW, Choi IJ, Kim CG, Lee JY, Cho SJ, et al. Long-term survival after endoscopic resection versus surgery in early gastric cancers. *Endoscopy*. 2015;47(4):293-301.
5. Cho JH, Cha SW, Kim HG, Lee TH, Cho JY, Ko WJ, et al. Long-term outcomes of endoscopic submucosal dissection for early gastric cancer: a comparison study to surgery using propensity score-matched analysis. *Surgical endoscopy*. 2016;30(9):3762-73.
6. Pyo JH, Lee H, Min BH, Lee JH, Choi MG, Lee JH, et al. Long-Term Outcome of Endoscopic Resection vs. Surgery for Early Gastric Cancer: A Non-inferiority-Matched Cohort Study. *Am J Gastroenterol*. 2016;111(2):240-9.
7. Chang JY, Shim KN, Tae CH, Lee KE, Lee J, Lee KH, et al. Comparison of clinical outcomes after endoscopic submucosal dissection and surgery in the treatment of early gastric cancer: A single-institute study. *Medicine (Baltimore)*. 2017;96(30):e7210.
8. Fukunaga S, Nagami Y, Shiba M, Ominami M, Tanigawa T, Yamagami H, et al. Long-term prognosis of expanded-indication differentiated-type early gastric cancer treated with endoscopic submucosal dissection or surgery using propensity score analysis. *Gastrointestinal endoscopy*. 2017;85(1):143-52.
9. Gong EJ, Kim DH, Ahn JY, Jung KW, Lee JH, Choi KD, et al. Comparison of long-term outcomes of endoscopic submucosal dissection and surgery for esophagogastric junction adenocarcinoma. *Gastric cancer : official journal of the International Gastric Cancer Association and the Japanese Gastric Cancer Association*. 2017;20(Suppl 1):84-91.
10. Shin DW, Hwang HY, Jeon SW. Comparison of Endoscopic Submucosal Dissection and Surgery for Differentiated Type Early Gastric Cancer within the Expanded Criteria. *Clin Endosc*. 2017;50(2):170-8.

11. Hahn KY, Park CH, Lee YK, Chung H, Park JC, Shin SK, et al. Comparative study between endoscopic submucosal dissection and surgery in patients with early gastric cancer. *Surgical endoscopy*. 2018;32(1):73-86.
12. Lee S, Choi KD, Han M, Na HK, Ahn JY, Jung KW, et al. Long-term outcomes of endoscopic submucosal dissection versus surgery in early gastric cancer meeting expanded indication including undifferentiated-type tumors: a criteria-based analysis. *Gastric cancer : official journal of the International Gastric Cancer Association and the Japanese Gastric Cancer Association*. 2018;21(3):490-9.

### **Statement 3**

1. Chiu PW, Teoh AY, To KF, Wong SK, Liu SY, Lam CC, et al. Endoscopic submucosal dissection (ESD) compared with gastrectomy for treatment of early gastric neoplasia: a retrospective cohort study. *Surgical endoscopy*. 2012;26(12):3584-91.
2. Park CH, Lee H, Kim DW, Chung H, Park JC, Shin SK, et al. Clinical safety of endoscopic submucosal dissection compared with surgery in elderly patients with early gastric cancer: a propensity-matched analysis. *Gastrointestinal endoscopy*. 2014;80(4):599-609.
3. Hahn KY, Park CH, Lee YK, Chung H, Park JC, Shin SK, et al. Comparative study between endoscopic submucosal dissection and surgery in patients with early gastric cancer. *Surgical endoscopy*. 2018;32(1):73-86.
4. Lee S, Choi KD, Han M, Na HK, Ahn JY, Jung KW, et al. Long-term outcomes of endoscopic submucosal dissection versus surgery in early gastric cancer meeting expanded indication including undifferentiated-type tumors: a criteria-based analysis. *Gastric cancer : official journal of the International Gastric Cancer Association and the Japanese Gastric Cancer Association*. 2018;21(3):490-9.
5. Park JC, Lee YK, Kim SY, Roh Y, Hahn KY, Shin SK, et al. Long-term outcomes of endoscopic submucosal dissection in comparison to surgery in undifferentiated-type intramucosal gastric cancer using propensity score analysis. *Surgical endoscopy*. 2018;32(4):2046-57.

#### **Statement 4**

1. Kusano C, Iwasaki M, Kaltenbach T, Conlin A, Oda I, Gotoda T. Should elderly patients undergo additional surgery after non-curative endoscopic resection for early gastric cancer? Long-term comparative outcomes. *Am J Gastroenterol.* 2011;106(6):1064-9.
2. Choi JY, Jeon SW, Cho KB, Park KS, Kim ES, Park CK, et al. Non-curative endoscopic resection does not always lead to grave outcomes in submucosal invasive early gastric cancer. *Surgical endoscopy.* 2015;29(7):1842-9.
3. Kim ER, Lee H, Min BH, Lee JH, Rhee PL, Kim JJ, et al. Effect of rescue surgery after non-curative endoscopic resection of early gastric cancer. *The British journal of surgery.* 2015;102(11):1394-401.
4. Noh GY, Ku HR, Kim YJ, Park SC, Kim J, Han CJ, et al. Clinical outcomes of early gastric cancer with lymphovascular invasion or positive vertical resection margin after endoscopic submucosal dissection. *Surgical endoscopy.* 2015;29(9):2583-9.
5. Eom BW, Kim YI, Kim KH, Yoon HM, Cho SJ, Lee JY, et al. Survival benefit of additional surgery after noncurative endoscopic resection in patients with early gastric cancer. *Gastrointestinal endoscopy.* 2017;85(1):155-63 e3.
6. Hatta W, Gotoda T, Oyama T, Kawata N, Takahashi A, Yoshifuku Y, et al. Is radical surgery necessary in all patients who do not meet the curative criteria for endoscopic submucosal dissection in early gastric cancer? A multi-center retrospective study in Japan. *J Gastroenterol.* 2017;52(2):175-84.
7. Jung DH, Lee YC, Kim JH, Lee SK, Shin SK, Park JC, et al. Additive treatment improves survival in elderly patients after non-curative endoscopic resection for early gastric cancer. *Surgical endoscopy.* 2017;31(3):1376-82.
8. Kawata N, Kakushima N, Takizawa K, Tanaka M, Makuuchi R, Tokunaga M, et al. Risk factors for lymph node metastasis and long-term outcomes of patients with early gastric cancer after non-curative endoscopic submucosal dissection. *Surgical endoscopy.* 2017;31(4):1607-16.
9. Suzuki H, Oda I, Abe S, Sekiguchi M, Nonaka S, Yoshinaga S, et al. Clinical outcomes of early gastric cancer patients after noncurative endoscopic submucosal dissection in a large consecutive patient series. *Gastric cancer : official journal of the International Gastric Cancer Association and the Japanese Gastric Cancer Association.* 2017;20(4):679-89.
10. Suzuki S, Gotoda T, Hatta W, Oyama T, Kawata N, Takahashi A, et al. Survival Benefit of Additional Surgery After Non-curative Endoscopic Submucosal Dissection for Early Gastric Cancer: A Propensity Score

Matching Analysis. *Ann Surg Oncol*. 2017;24(11):3353-60.

11. Toya Y, Endo M, Nakamura S, Akasaka R, Kosaka T, Yanai S, et al. Clinical outcomes of non-curative endoscopic submucosal dissection with negative resected margins for gastric cancer. *Gastrointestinal endoscopy*. 2017;85(6):1218-24.

12. Yano T, Ishido K, Tanabe S, Wada T, Azuma M, Kawanishi N, et al. Long-term outcomes of patients with early gastric cancer found to have lesions for which endoscopic treatment is not indicated on histopathological evaluation after endoscopic submucosal dissection. *Surgical endoscopy*. 2018;32(3):1314-23.

## Statement 5

1. Ahn SH, Lee JH, Park DJ, Kim HH. Comparative study of clinical outcomes between laparoscopy-assisted proximal gastrectomy (LAPG) and laparoscopy-assisted total gastrectomy (LATG) for proximal gastric cancer. *Gastric cancer : official journal of the International Gastric Cancer Association and the Japanese Gastric Cancer Association*. 2013;16(3):282-9.
2. An JY, Youn HG, Choi MG, Noh JH, Sohn TS, Kim S. The difficult choice between total and proximal gastrectomy in proximal early gastric cancer. *Am J Surg*. 2008;196(4):587-91.
3. Huh YJ, Lee HJ, Oh SY, Lee KG, Yang JY, Ahn HS, et al. Clinical Outcome of Modified Laparoscopy-Assisted Proximal Gastrectomy Compared to Conventional Proximal Gastrectomy or Total Gastrectomy for Upper-Third Early Gastric Cancer with Special References to Postoperative Reflux Esophagitis. *J Gastric Cancer*. 2015;15(3):191-200.
4. Jung DH, Lee Y, Kim DW, Park YS, Ahn SH, Park DJ, et al. Laparoscopic proximal gastrectomy with double tract reconstruction is superior to laparoscopic total gastrectomy for proximal early gastric cancer. *Surgical endoscopy*. 2017;31(10):3961-9.
5. Kitamura K, Yamaguchi T, Nishida S, Yamamoto K, Ichikawa D, Okamoto K, et al. The operative indications for proximal gastrectomy in patients with gastric cancer in the upper third of the stomach. *Surg Today*. 1997;27(11):993-8.
6. Masuzawa T, Takiguchi S, Hirao M, Imamura H, Kimura Y, Fujita J, et al. Comparison of perioperative and long-term outcomes of total and proximal gastrectomy for early gastric cancer: a multi-institutional retrospective study. *World J Surg*. 2014;38(5):1100-6.
7. Ohashi M, Morita S, Fukagawa T, Oda I, Kushima R, Katai H. Functional Advantages of Proximal Gastrectomy with Jejunal Interposition Over Total Gastrectomy with Roux-en-Y Esophagojejunostomy for Early Gastric Cancer. *World J Surg*. 2015;39(11):2726-33.
8. Takiguchi N, Takahashi M, Ikeda M, Inagawa S, Ueda S, Nobuoka T, et al. Long-term quality-of-life comparison of total gastrectomy and proximal gastrectomy by postgastrectomy syndrome assessment scale (PGSAS-45): a nationwide multi-institutional study. *Gastric cancer : official journal of the International Gastric Cancer Association and the Japanese Gastric Cancer Association*. 2015;18(2):407-16.
9. Toyomasu Y, Ogata K, Suzuki M, Yanoma T, Kimura A, Kogure N, et al. Restoration of gastrointestinal motility ameliorates nutritional deficiencies and body weight loss of patients who undergo laparoscopy-assisted proximal gastrectomy. *Surgical endoscopy*. 2017;31(3):1393-401.



10. Ushimaru Y, Fujiwara Y, Shishido Y, Yanagimoto Y, Moon JH, Sugimura K, et al. Clinical Outcomes of Gastric Cancer Patients Who Underwent Proximal or Total Gastrectomy: A Propensity Score-Matched Analysis. *World J Surg.* 2018;42(5):1477-84.

11. Yoo CH, Sohn BH, Han WK, Pae WK. Long-term results of proximal and total gastrectomy for adenocarcinoma of the upper third of the stomach. *Cancer Res Treat.* 2004;36(1):50-5.

12. Yoo CH, Sohn BH, Han WK, Pae WK. Proximal gastrectomy reconstructed by jejunal pouch interposition for upper third gastric cancer: prospective randomized study. *World J Surg.* 2005;29(12):1592-9.

#### **Statement 6**

1. Aizawa M, Honda M, Hiki N, Kinoshita T, Yabusaki H, Nunobe S, et al. Oncological outcomes of function-preserving gastrectomy for early gastric cancer: a multicenter propensity score matched cohort analysis comparing pylorus-preserving gastrectomy versus conventional distal gastrectomy. *Gastric cancer : official journal of the International Gastric Cancer Association and the Japanese Gastric Cancer Association.* 2017;20(4):709-17.

2. Ikeguchi M, Hatada T, Yamamoto M, Miyake T, Matsunaga T, Fukuda K, et al. Evaluation of a pylorus-preserving gastrectomy for patients preoperatively diagnosed with early gastric cancer located in the middle third of the stomach. *Surg Today.* 2010;40(3):228-33.

3. Nakane Y, Akehira K, Inoue K, Iiyama H, Sato M, Masuya Y, et al. Postoperative evaluation of pylorus-preserving gastrectomy for early gastric cancer. *Hepatogastroenterology.* 2000;47(32):590-5.

4. Suh YS, Han DS, Kong SH, Kwon S, Shin CI, Kim WH, et al. Laparoscopy-assisted pylorus-preserving gastrectomy is better than laparoscopy-assisted distal gastrectomy for middle-third early gastric cancer. *Annals of surgery.* 2014;259(3):485-93.

5. Xiao XM, Gao C, Yin W, Yu WH, Qi F, Liu T. Pylorus-Preserving versus Distal Subtotal Gastrectomy for Surgical Treatment of Early Gastric Cancer: A Meta-Analysis. *Hepato-Gastroenterol.* 2014;61(131):870-9.

### **Statement 7**

1. Cai Z, Zhou Y, Wang C, Yin Y, Yin Y, Shen C, et al. Optimal reconstruction methods after distal gastrectomy for gastric cancer: A systematic review and network meta-analysis. *Medicine (Baltimore)*. 2018;97(20):e10823.
2. Inokuchi M, Kojima K, Yamada H, Kato K, Hayashi M, Motoyama K, et al. Long-term outcomes of Roux-en-Y and Billroth-I reconstruction after laparoscopic distal gastrectomy. *Gastric cancer : official journal of the International Gastric Cancer Association and the Japanese Gastric Cancer Association*. 2013;16(1):67-73.
3. Lee MS, Ahn SH, Lee JH, Park DJ, Lee HJ, Kim HH, et al. What is the best reconstruction method after distal gastrectomy for gastric cancer? *Surgical endoscopy*. 2012;26(6):1539-47.
4. Tanigawa N, Nomura E, Lee SW, Kaminishi M, Sugiyama M, Aikou T, et al. Current state of gastric stump carcinoma in Japan: based on the results of a nationwide survey. *World J Surg*. 2010;34(7):1540-7.

**Statement 8**

1. Degiuli M, Calvo F. Survival of early gastric cancer in a specialized European center. Which lymphadenectomy is necessary? *World J Surg.* 2006;30(12):2193-203.
2. Folli S, Morgagni P, Roviello F, De Manzoni G, Marrelli D, Saragoni L, et al. Risk factors for lymph node metastases and their prognostic significance in early gastric cancer (EGC) for the Italian Research Group for Gastric Cancer (IRGGC). *Jpn J Clin Oncol.* 2001;31(10):495-9.
3. Shimoyama S, Yasuda H, Mafune K, Kaminishi M. Indications of a minimized scope of lymphadenectomy for submucosal gastric cancer. *Ann Surg Oncol.* 2002;9(7):625-31.

## Statement 9

1. Brar SS, Seevaratnam R, Cardoso R, Law C, Helyer L, Coburn N. A systematic review of spleen and pancreas preservation in extended lymphadenectomy for gastric cancer. *Gastric cancer : official journal of the International Gastric Cancer Association and the Japanese Gastric Cancer Association*. 2012;15 Suppl 1:S89-99.
2. Csendes A, Burdiles P, Rojas J, Braghetto I, Diaz JC, Maluenda F. A prospective randomized study comparing D2 total gastrectomy versus D2 total gastrectomy plus splenectomy in 187 patients with gastric carcinoma. *Surgery*. 2002;131(4):401-7.
3. Sano T, Sasako M, Mizusawa J, Yamamoto S, Katai H, Yoshikawa T, et al. Randomized Controlled Trial to Evaluate Splenectomy in Total Gastrectomy for Proximal Gastric Carcinoma. *Annals of surgery*. 2017;265(2):277-83.
4. Yang K, Chen X-Z, Hu J-K, Zhang B, Chen Z-X, Chen J-P. Effectiveness and safety of splenectomy for gastric carcinoma: A meta-analysis. *World Journal of Gastroenterology*. 2009;15(42):5352.
5. Yu W, Choi GS, Chung HY. Randomized clinical trial of splenectomy versus splenic preservation in patients with proximal gastric cancer. *The British journal of surgery*. 2006;93(5):559-63.

## Statement 10

1. Davies AR, Sandhu H, Pillai A, Sinha P, Mattsson F, Forshaw MJ, et al. Surgical resection strategy and the influence of radicality on outcomes in oesophageal cancer. *The British journal of surgery*. 2014;101(5):511-7.
2. Hulscher JB, van Sandick JW, de Boer AG, Wijnhoven BP, Tijssen JG, Fockens P, et al. Extended transthoracic resection compared with limited transhiatal resection for adenocarcinoma of the esophagus. *N Engl J Med*. 2002;347(21):1662-9.
3. Kurokawa Y, Sasako M, Sano T, Yoshikawa T, Iwasaki Y, Nashimoto A, et al. Ten-year follow-up results of a randomized clinical trial comparing left thoracoabdominal and abdominal transhiatal approaches to total gastrectomy for adenocarcinoma of the oesophagogastric junction or gastric cardia. *The British journal of surgery*. 2015;102(4):341-8.
4. Lee IS, Ahn JY, Yook JH, Kim BS. Mediastinal lymph node dissection and distal esophagectomy is not essential in early esophagogastric junction adenocarcinoma. *World J Surg Oncol*. 2017;15(1):28.
5. Omloo JM, Lagarde SM, Hulscher JB, Reitsma JB, Fockens P, van Dekken H, et al. Extended transthoracic resection compared with limited transhiatal resection for adenocarcinoma of the mid/distal esophagus: five-year survival of a randomized clinical trial. *Annals of surgery*. 2007;246(6):992-1000; discussion -1.
6. Sasako M, Sano T, Yamamoto S, Sairenji M, Arai K, Kinoshita T, et al. Left thoracoabdominal approach versus abdominal-transhiatal approach for gastric cancer of the cardia or subcardia: a randomised controlled trial. *Lancet Oncol*. 2006;7(8):644-51.
7. Zheng Z, Cai J, Yin J, Zhang J, Zhang ZT, Wang KL. Transthoracic versus abdominal-transhiatal resection for treating Siewert type II/III adenocarcinoma of the esophagogastric junction: a meta-analysis. *Int J Clin Exp Med*. 2015;8(10):17167-82.

### **Statement 11**

1. Hayashi H, Ochiai T, Shimada H, Gunji Y. Prospective randomized study of open versus laparoscopy-assisted distal gastrectomy with extraperigastric lymph node dissection for early gastric cancer. *Surgical endoscopy*. 2005;19(9):1172-6.
2. Kim W, Kim HH, Han SU, Kim MC, Hyung WJ, Ryu SW, et al. Decreased Morbidity of Laparoscopic Distal Gastrectomy Compared With Open Distal Gastrectomy for Stage I Gastric Cancer: Short-term Outcomes From a Multicenter Randomized Controlled Trial (KLASS-01). *Annals of surgery*. 2016;263(1):28-35.
3. Kim YW, Baik YH, Yun YH, Nam BH, Kim DH, Choi IJ, et al. Improved quality of life outcomes after laparoscopy-assisted distal gastrectomy for early gastric cancer: results of a prospective randomized clinical trial. *Annals of surgery*. 2008;248(5):721-7.
4. Kim YW, Yoon HM, Yun YH, Nam BH, Eom BW, Baik YH, et al. Long-term outcomes of laparoscopy-assisted distal gastrectomy for early gastric cancer: result of a randomized controlled trial (COACT 0301). *Surgical endoscopy*. 2013;27(11):4267-76.
5. Kitano S, Shiraishi N, Fujii K, Yasuda K, Inomata M, Adachi Y. A randomized controlled trial comparing open vs laparoscopy-assisted distal gastrectomy for the treatment of early gastric cancer: An interim report. *Surgery*. 2002;131(1):S306-S11.
6. Lee JH, Han HS, Lee JH. A prospective randomized study comparing open vs laparoscopy-assisted distal gastrectomy in early gastric cancer: early results. *Surgical endoscopy*. 2005;19(2):168-73.
7. Sakuramoto S, Yamashita K, Kikuchi S, Futawatari N, Katada N, Watanabe M, et al. Laparoscopy versus open distal gastrectomy by expert surgeons for early gastric cancer in Japanese patients: short-term clinical outcomes of a randomized clinical trial. *Surgical endoscopy*. 2013;27(5):1695-705.
8. Takiguchi S, Fujiwara Y, Yamasaki M, Miyata H, Nakajima K, Sekimoto M, et al. Laparoscopy-assisted distal gastrectomy versus open distal gastrectomy. A prospective randomized single-blind study. *World J Surg*. 2013;37(10):2379-86.
9. Yamashita K, Sakuramoto S, Kikuchi S, Futawatari N, Katada N, Hosoda K, et al. Laparoscopic versus open distal gastrectomy for early gastric cancer in Japan: long-term clinical outcomes of a randomized clinical trial. *Surg Today*. 2016;46(6):741-9.

## Statement 12

1. Cai JW, D. Gao, C. F. Zhang, C. S. Zhang, H. Zhao, T. A prospective randomized study comparing open versus laparoscopy-assisted D2 radical gastrectomy in advanced gastric cancer. *Digestive Surgery*. 2011;28(5-6):331-7.
2. Cui ML, Z. Xing, J. Yao, Z. Liu, M. Chen, L. Zhang, C. Yang, H. Zhang, N. Tan, F. Jiang, B. Di, J. Wang, Z. Ji, J. Su, X. A prospective randomized clinical trial comparing D2 dissection in laparoscopic and open gastrectomy for gastric cancer. *Med Oncol*. 2015;32(10):241.
3. Hu YH, C. Sun, Y. Su, X. Cao, H. Hu, J. Xue, Y. Suo, J. Tao, K. He, X. Wei, H. Ying, M. Hu, W. Du, X. Chen, P. Liu, H. Zheng, C. Liu, F. Yu, J. Li, Z. Zhao, G. Chen, X. Wang, K. Li, P. Xing, J. Li, G. Morbidity and Mortality of Laparoscopic Versus Open D2 Distal Gastrectomy for Advanced Gastric Cancer: A Randomized Controlled Trial. *Journal of Clinical Oncology*. 2016;34(12):1350-7.
4. Huscher CG, Mingoli A, Sgarzini G, Sansonetti A, Di Paola M, Recher A, et al. Laparoscopic versus open subtotal gastrectomy for distal gastric cancer: five-year results of a randomized prospective trial. *Annals of surgery*. 2005;241(2):232-7.
5. Inaki N, Etoh T, Ohyama T, Uchiyama K, Katada N, Koeda K, et al. A multi-institutional, prospective, phase II feasibility study of laparoscopy-assisted distal gastrectomy with D2 lymph node dissection for locally advanced gastric cancer (JLSSG0901). *World journal of surgery*. 2015;39(11):2734-41.
6. Park YKY, H. M. Kim, Y. W. Park, J. Y. Ryu, K. W. Lee, Y. J. Jeong, O. Yoon, K. Y. Lee, J. H. Lee, S. E. Yu, W. Jeong, S. H. Kim, T. Kim, S. Nam, B. H. Laparoscopy-Assisted versus Open D2 Distal Gastrectomy for Advanced Gastric Cancer: Results from a Randomized Phase II Multicenter Clinical Trial (COACT 1001). *Annals of Surgery*. 2017;09.

### **Statement 13**

1. Bang YJ, Kim YW, Yang HK, Chung HC, Park YK, Lee KH, et al. Adjuvant capecitabine and oxaliplatin for gastric cancer after D2 gastrectomy (CLASSIC): a phase 3 open-label, randomised controlled trial. *Lancet*. 2012;379(9813):315-21.
2. Noh SH, Park SR, Yang HK, Chung HC, Chung IJ, Kim SW, et al. Adjuvant capecitabine plus oxaliplatin for gastric cancer after D2 gastrectomy (CLASSIC): 5-year follow-up of an open-label, randomised phase 3 trial. *Lancet Oncol*. 2014;15(12):1389-96.
3. Sakuramoto S, Sasako M, Yamaguchi T, Kinoshita T, Fujii M, Nashimoto A, et al. Adjuvant chemotherapy for gastric cancer with S-1, an oral fluoropyrimidine. *N Engl J Med*. 2007;357(18):1810-20.
4. Sasako M, Sakuramoto S, Katai H, Kinoshita T, Furukawa H, Yamaguchi T, et al. Five-year outcomes of a randomized phase III trial comparing adjuvant chemotherapy with S-1 versus surgery alone in stage II or III gastric cancer. *Journal of clinical oncology : official journal of the American Society of Clinical Oncology*. 2011;29(33):4387-93.



#### Statement 14

1. Bamias A, Karina M, Papakostas P, Kostopoulos I, Bobos M, Vourli G, et al. A randomized phase III study of adjuvant platinum/docetaxel chemotherapy with or without radiation therapy in patients with gastric cancer. *Cancer chemotherapy and pharmacology*. 2010;65(6):1009-21.
2. Dai Q, Jiang L, Lin RJ, Wei KK, Gan LL, Deng CH, et al. Adjuvant chemoradiotherapy versus chemotherapy for gastric cancer: a meta-analysis of randomized controlled trials. *J Surg Oncol*. 2015;111(3):277-84.
3. Huang YY, Yang Q, Zhou SW, Wei Y, Chen YX, Xie DR, et al. Postoperative chemoradiotherapy versus postoperative chemotherapy for completely resected gastric cancer with D2 Lymphadenectomy: a meta-analysis. *PLoS One*. 2013;8(7):e68939.
4. Kim TH, Park SR, Ryu KW, Kim YW, Bae JM, Lee JH, et al. Phase 3 trial of postoperative chemotherapy alone versus chemoradiation therapy in stage III-IV gastric cancer treated with R0 gastrectomy and D2 lymph node dissection. *International journal of radiation oncology, biology, physics*. 2012;84(5):e585-92.
5. Kwon HC, Kim MC, Kim KH, Jang JS, Oh SY, Kim SH, et al. Adjuvant chemoradiation versus chemotherapy in completely resected advanced gastric cancer with D2 nodal dissection. *Asia-Pacific journal of clinical oncology*. 2010;6(4):278-85.
6. Lee J, Lim DH, Kim S, Park SH, Park JO, Park YS, et al. Phase III trial comparing capecitabine plus cisplatin versus capecitabine plus cisplatin with concurrent capecitabine radiotherapy in completely resected gastric cancer with D2 lymph node dissection: the ARTIST trial. *Journal of clinical oncology : official journal of the American Society of Clinical Oncology*. 2012;30(3):268-73.
7. Min C, Bangalore S, Jhavar S, Guo Y, Nicholson J, Formenti SC, et al. Chemoradiation therapy versus chemotherapy alone for gastric cancer after R0 surgical resection: a meta-analysis of randomized trials. *Oncology*. 2014;86(2):79-85.
8. Soon YY, Leong CN, Tey JC, Tham IW, Lu JJ. Postoperative chemo-radiotherapy versus chemotherapy for resected gastric cancer: a systematic review and meta-analysis. *Journal of medical imaging and radiation oncology*. 2014;58(4):483-96.
9. Valentini V, Cellini F, Minsky BD, Mattiucci GC, Balducci M, D'Agostino G, et al. Survival after radiotherapy in gastric cancer: systematic review and meta-analysis. *Radiotherapy and oncology : journal of the European Society for Therapeutic Radiology and Oncology*. 2009;92(2):176-83.
10. Zhou ML, Kang M, Li GC, Guo XM, Zhang Z. Postoperative chemoradiotherapy versus chemotherapy for R0 resected gastric cancer with D2 lymph node dissection: an up-to-date meta-analysis. *World J Surg Oncol*.

2016;14(1):209.

11. Zhu WG, Xua DF, Pu J, Zong CD, Li T, Tao GZ, et al. A randomized, controlled, multicenter study comparing intensity-modulated radiotherapy plus concurrent chemotherapy with chemotherapy alone in gastric cancer patients with D2 resection. *Radiotherapy and oncology : journal of the European Society for Therapeutic Radiology and Oncology*. 2012;104(3):361-6.

**Statement 15**

1. Cunningham D, Allum WH, Stenning SP, Thompson JN, Van de Velde CJ, Nicolson M, et al. Perioperative chemotherapy versus surgery alone for resectable gastroesophageal cancer. *N Engl J Med.* 2006;355(1):11-20.
2. Iwasaki Y, Terashima M, Mizusawa J, Katayama H, Nakamura K, Katai H, et al. Randomized phase III trial of gastrectomy with or without neoadjuvant S-1 plus cisplatin for type 4 or large type 3 gastric cancer: Japan Clinical Oncology Group study (JCOG0501). *Journal of Clinical Oncology.* 2018;36(15\_suppl):4046-.
3. Ychou M, Boige V, Pignon JP, Conroy T, Bouche O, Lebreton G, et al. Perioperative chemotherapy compared with surgery alone for resectable gastroesophageal adenocarcinoma: an FNCLCC and FFCD multicenter phase III trial. *Journal of clinical oncology : official journal of the American Society of Clinical Oncology.* 2011;29(13):1715-21.

## Statement 16

1. Fu T, Bu ZD, Li ZY, Zhang LH, Wu XJ, Wu AW, et al. Neoadjuvant chemoradiation therapy for resectable esophago-gastric adenocarcinoma: a meta-analysis of randomized clinical trials. *BMC cancer*. 2015;15:322.
2. Klevebro F, Alexandersson von Döbeln G, Wang N, Johnsen G, Jacobsen AB, Friesland S, et al. A randomized clinical trial of neoadjuvant chemotherapy versus neoadjuvant chemoradiotherapy for cancer of the oesophagus or gastro-oesophageal junction. *Ann Oncol*. 2016;27(4):660-7.
3. Kumagai K, Rouvelas I, Tsai JA, Mariosa D, Lind PA, Lindblad M, et al. Survival benefit and additional value of preoperative chemoradiotherapy in resectable gastric and gastro-oesophageal junction cancer: a direct and adjusted indirect comparison meta-analysis. *European journal of surgical oncology : the journal of the European Society of Surgical Oncology and the British Association of Surgical Oncology*. 2015;41(3):282-94.
4. Leong T, Smithers BM, Haustermans K, Michael M, GebSKI V, Miller D, et al. TOPGEAR: A Randomized, Phase III Trial of Perioperative ECF Chemotherapy with or Without Preoperative Chemoradiation for Resectable Gastric Cancer: Interim Results from an International, Intergroup Trial of the AGITG, TROG, EORTC and CCTG. *Ann Surg Oncol*. 2017;24(8):2252-8.
5. Ronellenfitsch U, Schwarzbach M, Hofheinz R, Kienle P, Kieser M, Slinger TE, et al. Preoperative chemo(radio)therapy versus primary surgery for gastroesophageal adenocarcinoma: systematic review with meta-analysis combining individual patient and aggregate data. *Eur J Cancer*. 2013;49(15):3149-58.
6. Stahl M, Walz MK, Riera-Knorrenschild J, Stuschke M, Sandermann A, Bitzer M, et al. Preoperative chemotherapy versus chemoradiotherapy in locally advanced adenocarcinomas of the oesophagogastric junction (POET): Long-term results of a controlled randomised trial. *Eur J Cancer*. 2017;81:183-90.
7. Valentini V, Cellini F, Minsky BD, Mattiucci GC, Balducci M, D'Agostino G, et al. Survival after radiotherapy in gastric cancer: systematic review and meta-analysis. *Radiotherapy and oncology : journal of the European Society for Therapeutic Radiology and Oncology*. 2009;92(2):176-83.

### **Statement 17**

1. Fujitani KY, H. K. Mizusawa, J. Kim, Y. W. Terashima, M. Han, S. U. Iwasaki, Y. Hyung, W. J. Takagane, A. Park, D. J. Yoshikawa, T. Hahn, S. Nakamura, K. Park, C. H. Kurokawa, Y. Bang, Y. J. Park, B. J. Sasako, M. Tsujinaka, T. Gastrectomy plus chemotherapy versus chemotherapy alone for advanced gastric cancer with a single non-curable factor (REGATTA): A phase 3, randomised controlled trial. *The Lancet Oncology*. 2016;17(3):309-18.
2. Lasithiotakis K, Antoniou SA, Antoniou GA, Kaklamanos I, Zoras O. Gastrectomy for stage IV gastric cancer. a systematic review and meta-analysis. *Anticancer research*. 2014;34(5):2079-85.
3. Sun JS, Y. Wang, Z. Chen, X. Gao, P. Xu, Y. Zhou, B. Xu, H. Clinical significance of palliative gastrectomy on the survival of patients with incurable advanced gastric cancer: a systematic review and meta-analysis. *BMC cancer*. 2013;13:577.

## Statement 18

1. Ajani JA, Rodriguez W, Bodoky G, Moiseyenko V, Lichinitser M, Gorbunova V, et al. Multicenter phase III comparison of cisplatin/S-1 with cisplatin/infusional fluorouracil in advanced gastric or gastroesophageal adenocarcinoma study: the FLAGS trial. *Journal of clinical oncology : official journal of the American Society of Clinical Oncology*. 2010;28(9):1547-53.
2. Al-Batran SE, Hartmann JT, Probst S, Schmalenberg H, Hollerbach S, Hofheinz R, et al. Phase III trial in metastatic gastroesophageal adenocarcinoma with fluorouracil, leucovorin plus either oxaliplatin or cisplatin: a study of the Arbeitsgemeinschaft Internistische Onkologie. *Journal of clinical oncology : official journal of the American Society of Clinical Oncology*. 2008;26(9):1435-42.
3. Bang YJ, Van Cutsem E, Feyereislova A, Chung HC, Shen L, Sawaki A, et al. Trastuzumab in combination with chemotherapy versus chemotherapy alone for treatment of HER2-positive advanced gastric or gastro-oesophageal junction cancer (ToGA): a phase 3, open-label, randomised controlled trial. *Lancet*. 2010;376(9742):687-97.
4. Boku N, Yamamoto S, Fukuda H, Shirao K, Doi T, Sawaki A, et al. Fluorouracil versus combination of irinotecan plus cisplatin versus S-1 in metastatic gastric cancer: a randomised phase 3 study. *Lancet Oncol*. 2009;10(11):1063-9.
5. Cunningham D, Starling N, Rao S, Iveson T, Nicolson M, Coxon F, et al. Capecitabine and oxaliplatin for advanced esophagogastric cancer. *N Engl J Med*. 2008;358(1):36-46.
6. Glimelius B, Ekstrom K, Hoffman K, Graf W, Sjoden PO, Haglund U, et al. Randomized comparison between chemotherapy plus best supportive care with best supportive care in advanced gastric cancer. *Ann Oncol*. 1997;8(2):163-8.
7. Kang YK, Kang WK, Shin DB, Chen J, Xiong J, Wang J, et al. Capecitabine/cisplatin versus 5-fluorouracil/cisplatin as first-line therapy in patients with advanced gastric cancer: a randomised phase III noninferiority trial. *Ann Oncol*. 2009;20(4):666-73.
8. Murad AM, Santiago FF, Petroianu A, Rocha PR, Rodrigues MA, Rausch M. Modified therapy with 5-fluorouracil, doxorubicin, and methotrexate in advanced gastric cancer. *Cancer*. 1993;72(1):37-41.
9. Pyrhonen S, Kuitunen T, Nyandoto P, Kouri M. Randomised comparison of fluorouracil, epidoxorubicin and methotrexate (FEMTX) plus supportive care with supportive care alone in patients with non-resectable gastric cancer. *Br J Cancer*. 1995;71(3):587-91.
10. Ryu M-H, Park YI, Chung I-J, Lee K-W, Oh H-S, Lee KH, et al. Phase III trial of s-1 plus oxaliplatin (SOX)

vs s-1 plus cisplatin (SP) combination chemotherapy for first-line treatment of advanced gastric cancer (AGC): SOPP study. *Journal of Clinical Oncology*. 2016;34(15\_suppl):4015-.

11. Van Cutsem E, Moiseyenko VM, Tjulandin S, Majlis A, Constenla M, Boni C, et al. Phase III study of docetaxel and cisplatin plus fluorouracil compared with cisplatin and fluorouracil as first-line therapy for advanced gastric cancer: a report of the V325 Study Group. *Journal of clinical oncology : official journal of the American Society of Clinical Oncology*. 2006;24(31):4991-7.

12. Wagner AD, Grothe W, Haerting J, Kleber G, Grothey A, Fleig WE. Chemotherapy in advanced gastric cancer: a systematic review and meta-analysis based on aggregate data. *Journal of clinical oncology : official journal of the American Society of Clinical Oncology*. 2006;24(18):2903-9.

13. Wagner AD, Syn NL, Moehler M, Grothe W, Yong WP, Tai BC, et al. Chemotherapy for advanced gastric cancer. *Cochrane Database Syst Rev*. 2017;8:CD004064.

14. Yamada Y, Higuchi K, Nishikawa K, Gotoh M, Fuse N, Sugimoto N, et al. Phase III study comparing oxaliplatin plus S-1 with cisplatin plus S-1 in chemotherapy-naive patients with advanced gastric cancer. *Ann Oncol*. 2015;26(1):141-8.

## Statement 19

1. Ford HE, Marshall A, Bridgewater JA, Janowitz T, Coxon FY, Wadsley J, et al. Docetaxel versus active symptom control for refractory oesophagogastric adenocarcinoma (COUGAR-02): an open-label, phase 3 randomised controlled trial. *Lancet Oncol.* 2014;15(1):78-86.
2. Fuchs CS, Tomasek J, Yong CJ, Dumitru F, Passalacqua R, Goswami C, et al. Ramucirumab monotherapy for previously treated advanced gastric or gastro-oesophageal junction adenocarcinoma (REGARD): an international, randomised, multicentre, placebo-controlled, phase 3 trial. *Lancet.* 2014;383(9911):31-9.
3. Hironaka S, Ueda S, Yasui H, Nishina T, Tsuda M, Tsumura T, et al. Randomized, open-label, phase III study comparing irinotecan with paclitaxel in patients with advanced gastric cancer without severe peritoneal metastasis after failure of prior combination chemotherapy using fluoropyrimidine plus platinum: WJOG 4007 trial. *Journal of clinical oncology : official journal of the American Society of Clinical Oncology.* 2013;31(35):4438-44.
4. Kang JH, Lee SI, Lim DH, Park KW, Oh SY, Kwon HC, et al. Salvage chemotherapy for pretreated gastric cancer: a randomized phase III trial comparing chemotherapy plus best supportive care with best supportive care alone. *Journal of clinical oncology : official journal of the American Society of Clinical Oncology.* 2012;30(13):1513-8.
5. Kim HS, Kim HJ, Kim SY, Kim TY, Lee KW, Baek SK, et al. Second-line chemotherapy versus supportive cancer treatment in advanced gastric cancer: a meta-analysis. *Ann Oncol.* 2013;24(11):2850-4.
6. Lee KW, Maeng CH, Kim TY, Zang DY, Kim YH, Hwang IG, et al. A Phase III Study to Compare the Efficacy and Safety of Paclitaxel Versus Irinotecan in Patients with Metastatic or Recurrent Gastric Cancer Who Failed in First-line Therapy (KCSG ST10-01). *Oncologist.* 2018.
7. Thuss-Patience PC, Kretzschmar A, Bichev D, Deist T, Hinke A, Breithaupt K, et al. Survival advantage for irinotecan versus best supportive care as second-line chemotherapy in gastric cancer--a randomised phase III study of the Arbeitsgemeinschaft Internistische Onkologie (AIO). *Eur J Cancer.* 2011;47(15):2306-14.
8. Wilke H, Muro K, Van Cutsem E, Oh SC, Bodoky G, Shimada Y, et al. Ramucirumab plus paclitaxel versus placebo plus paclitaxel in patients with previously treated advanced gastric or gastro-oesophageal junction adenocarcinoma (RAINBOW): a double-blind, randomised phase 3 trial. *Lancet Oncol.* 2014;15(11):1224-35.





## Statement 20

1. Fuchs CS, Doi T, Jang RW, Muro K, Satoh T, Machado M, et al. Safety and Efficacy of Pembrolizumab Monotherapy in Patients With Previously Treated Advanced Gastric and Gastroesophageal Junction Cancer: Phase 2 Clinical KEYNOTE-059 Trial. *JAMA Oncol.* 2018;4(5):e180013.
2. Kang JH, Lee SI, Lim DH, Park KW, Oh SY, Kwon HC, et al. Salvage chemotherapy for pretreated gastric cancer: a randomized phase III trial comparing chemotherapy plus best supportive care with best supportive care alone. *Journal of clinical oncology : official journal of the American Society of Clinical Oncology.* 2012;30(13):1513-8.
3. Kang YK, Boku N, Satoh T, Ryu MH, Chao Y, Kato K, et al. Nivolumab in patients with advanced gastric or gastro-oesophageal junction cancer refractory to, or intolerant of, at least two previous chemotherapy regimens (ONO-4538-12, ATTRACTION-2): a randomised, double-blind, placebo-controlled, phase 3 trial. *Lancet.* 2017;390(10111):2461-71.
4. Li J, Qin S, Xu J, Xiong J, Wu C, Bai Y, et al. Randomized, Double-Blind, Placebo-Controlled Phase III Trial of Apatinib in Patients With Chemotherapy-Refractory Advanced or Metastatic Adenocarcinoma of the Stomach or Gastroesophageal Junction. *Journal of clinical oncology : official journal of the American Society of Clinical Oncology.* 2016;34(13):1448-54.
5. Muro K, Chung HC, Shankaran V, Geva R, Catenacci D, Gupta S, et al. Pembrolizumab for patients with PD-L1-positive advanced gastric cancer (KEYNOTE-012): a multicentre, open-label, phase 1b trial. *Lancet Oncol.* 2016;17(6):717-26.
6. Taberero J SK, Dvorkin M, et al. Overall survival results from a phase III trial of trifluridine/tipitacil vs. placebo in patients with metastatic gastric cancer refractory to standard therapies (TAGS). *Ann Oncol.* 2018;29(suppl 5):LBA-002.

## Statement 21

1. Depypere L, Lerut T, Moons J, Coosemans W, Decker G, Van Veer H, et al. Isolated local recurrence or solitary solid organ metastasis after esophagectomy for cancer is not the end of the road. *Diseases of the esophagus : official journal of the International Society for Diseases of the Esophagus*. 2017;30(1):1-8.
2. Hingorani M, Dixit S, Johnson M, Plested V, Alty K, Colley P, et al. Palliative Radiotherapy in the Presence of Well-Controlled Metastatic Disease after Initial Chemotherapy May Prolong Survival in Patients with Metastatic Esophageal and Gastric Cancer. *Cancer Res Treat*. 2015;47(4):706-17.
3. Kim BH, Eom KY, Kim JS, Kim HH, Park DJ. Role of salvage radiotherapy for regional lymph node recurrence after radical surgery in advanced gastric cancer. *Radiat Oncol J*. 2013;31(3):147-54.
4. Sun J, Sun YH, Zeng ZC, Qin XY, Zeng MS, Chen B, et al. Consideration of the role of radiotherapy for abdominal lymph node metastases in patients with recurrent gastric cancer. *International journal of radiation oncology, biology, physics*. 2010;77(2):384-91.
5. Tey J, Back MF, Shakespeare TP, Mukherjee RK, Lu JJ, Lee KM, et al. The role of palliative radiation therapy in symptomatic locally advanced gastric cancer. *International journal of radiation oncology, biology, physics*. 2007;67(2):385-8.
6. Tey J, Choo BA, Leong CN, Loy EY, Wong LC, Lim K, et al. Clinical outcome of palliative radiotherapy for locally advanced symptomatic gastric cancer in the modern era. *Medicine (Baltimore)*. 2014;93(22):e118.
7. Yoshikawa T, Tsuburaya A, Hirabayashi N, Yoshida K, Nagata N, Kodera Y, et al. A phase I study of palliative chemoradiation therapy with paclitaxel and cisplatin for local symptoms due to an unresectable primary advanced or locally recurrent gastric adenocarcinoma. *Cancer chemotherapy and pharmacology*. 2009;64(6):1071-7.

## Statement 22

1. Cotte E, Peyrat P, Piaton E, Chapuis F, Rivoire M, Glehen O, et al. Lack of prognostic significance of conventional peritoneal cytology in colorectal and gastric cancers: results of EVOCAPE 2 multicentre prospective study. *European journal of surgical oncology : the journal of the European Society of Surgical Oncology and the British Association of Surgical Oncology*. 2013;39(7):707-14.
2. Jamel S, Markar SR, Malietzis G, Acharya A, Athanasiou T, Hanna GB. Prognostic significance of peritoneal lavage cytology in staging gastric cancer: systematic review and meta-analysis. *Gastric cancer : official journal of the International Gastric Cancer Association and the Japanese Gastric Cancer Association*. 2018;21(1):10-8.
3. Kang KK, Hur H, Byun CS, Kim YB, Han SU, Cho YK. Conventional cytology is not beneficial for predicting peritoneal recurrence after curative surgery for gastric cancer: results of a prospective clinical study. *J Gastric Cancer*. 2014;14(1):23-31.
4. La Torre M, Ferri M, Giovagnoli MR, Sforza N, Cosenza G, Giarnieri E, et al. Peritoneal wash cytology in gastric carcinoma. Prognostic significance and therapeutic consequences. *European journal of surgical oncology : the journal of the European Society of Surgical Oncology and the British Association of Surgical Oncology*. 2010;36(10):982-6.
5. Leake PA, Cardoso R, Seevaratnam R, Lourenco L, Helyer L, Mahar A, et al. A systematic review of the accuracy and utility of peritoneal cytology in patients with gastric cancer. *Gastric cancer : official journal of the International Gastric Cancer Association and the Japanese Gastric Cancer Association*. 2012;15 Suppl 1:S27-37.
6. Lee SD, Ryu KW, Eom BW, Lee JH, Kook MC, Kim YW. Prognostic significance of peritoneal washing cytology in patients with gastric cancer. *The British journal of surgery*. 2012;99(3):397-403.
7. Mezhir JJ, Shah MA, Jacks LM, Brennan MF, Coit DG, Strong VE. Positive peritoneal cytology in patients with gastric cancer: natural history and outcome of 291 patients. *Ann Surg Oncol*. 2010;17(12):3173-80.
8. Pecqueux M, Fritzmann J, Adamu M, Thorlund K, Kahlert C, Reissfelder C, et al. Free intraperitoneal tumor cells and outcome in gastric cancer patients: a systematic review and meta-analysis. *Oncotarget*. 2015;6(34):35564-78.
9. Shimizu H, Imamura H, Ohta K, Miyazaki Y, Kishimoto T, Fukunaga M, et al. Usefulness of staging laparoscopy for advanced gastric cancer. *Surg Today*. 2010;40(2):119-24.
10. Tustumi F, Bernardo WM, Dias AR, Ramos MF, Ceconello I, Zilberstein B, et al. Detection value of free cancer cells in peritoneal washing in gastric cancer: a systematic review and meta-analysis. *Clinics (Sao Paulo)*. 2016;71(12):733-45.
